# Supplementary material for: Ubiquitination and proteasomal degradation of ATG12 regulates its proapoptotic activity
Source: PubMed Central journal article supplement — Autophagy. 2015 Jan 28;10(12):2269–78. doi: 10.4161/15548627.2014.981914 (PMC4502749; doi:10.4161/15548627.2014.981914), 2015-01-28

Supplementary Figure 1

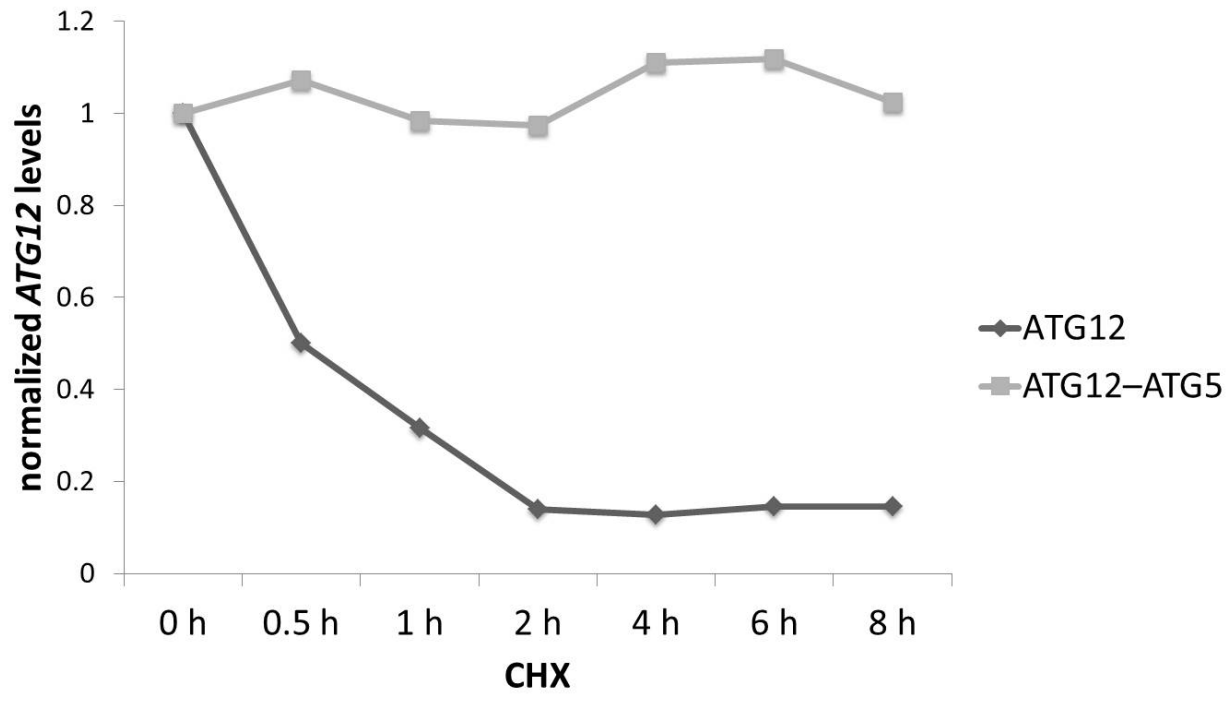

# Supplementary Figure 2

A

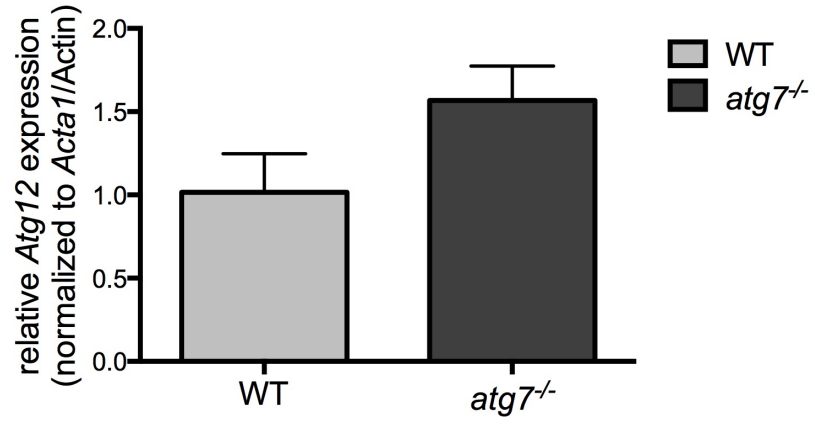

B

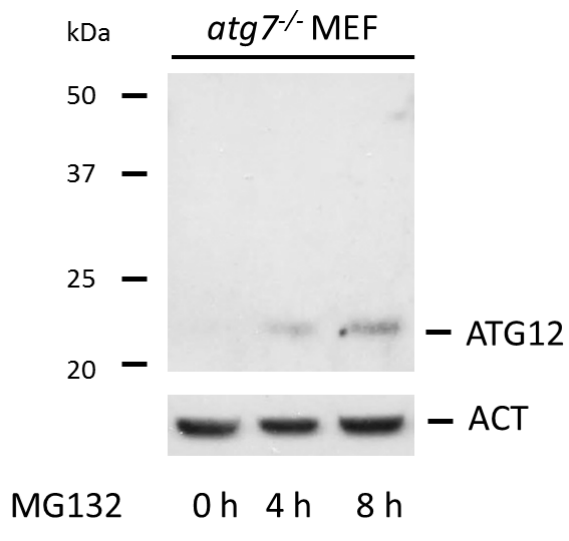

C

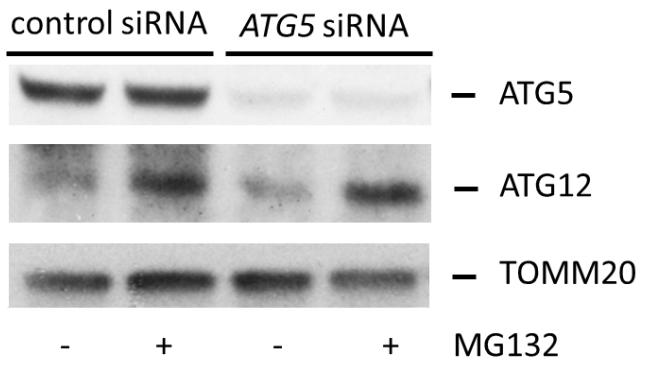

# Supplementary Figure 3

**A**

```

      20
      |
MAEE PQSVLQLPTS IAAGGE
      40
      |
GLTDVSPETTTPEPPSSAAV
      60
      |
      mutant 1 mutant 2
      |
SPGTEEPAGDTKKKIDILLK
      80
      |
      mutant 3
      |
AVGDTPIMKTKKWAVERTRT
      100
      |
      mutant 4
      |
IQGLIDFICKFLKLVASEQL
      120
      |
FIYVNQSFAPSPDQEVGTLY
      140
      |
      mutant 5 mutant 6
      |
ECFGSDGKLVLVHYCKSQAWG
    
```

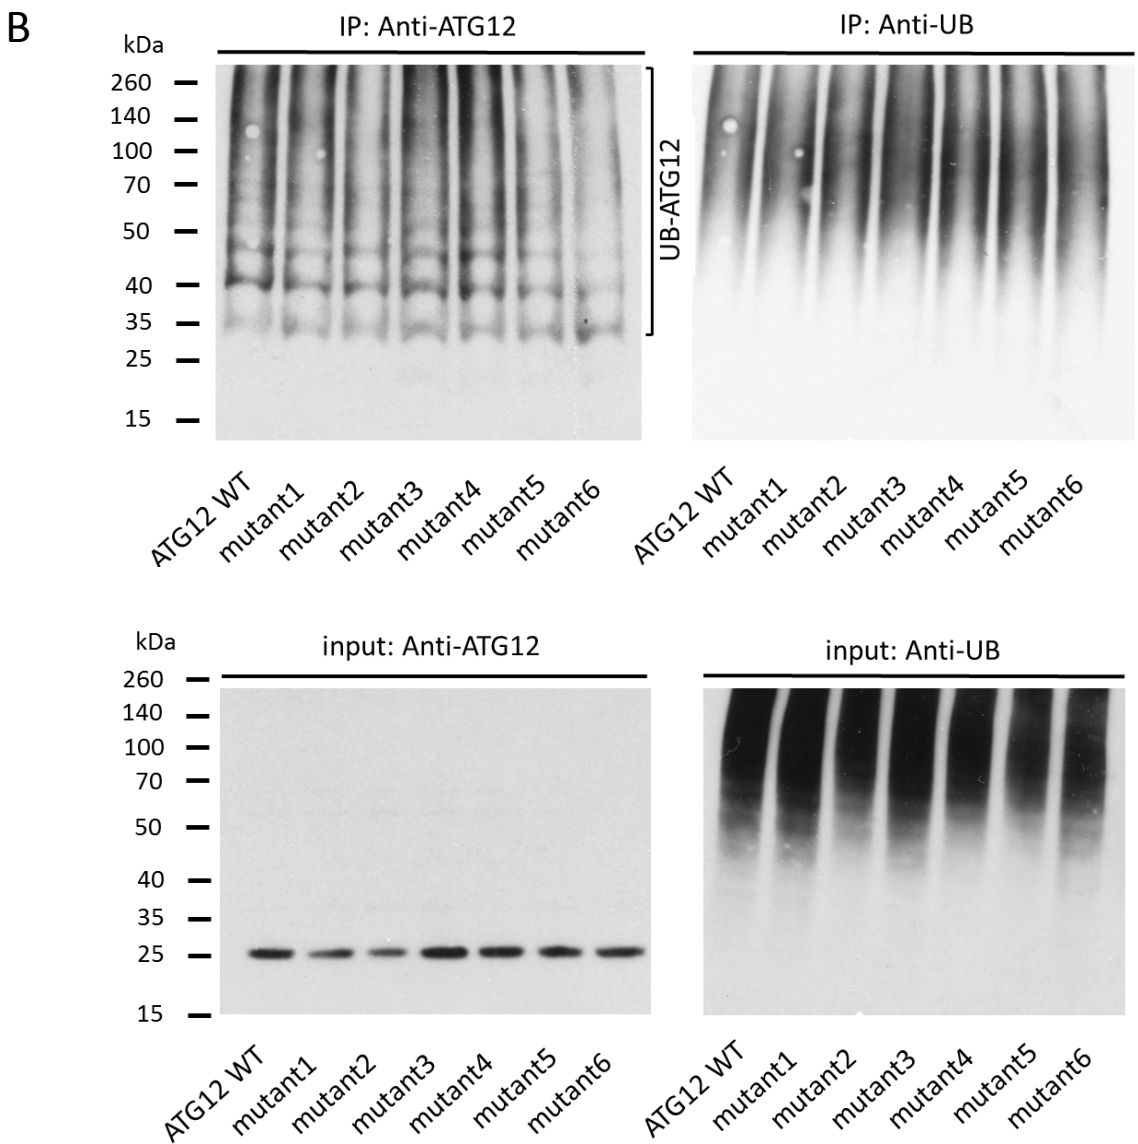

# Supplementary Figure 4

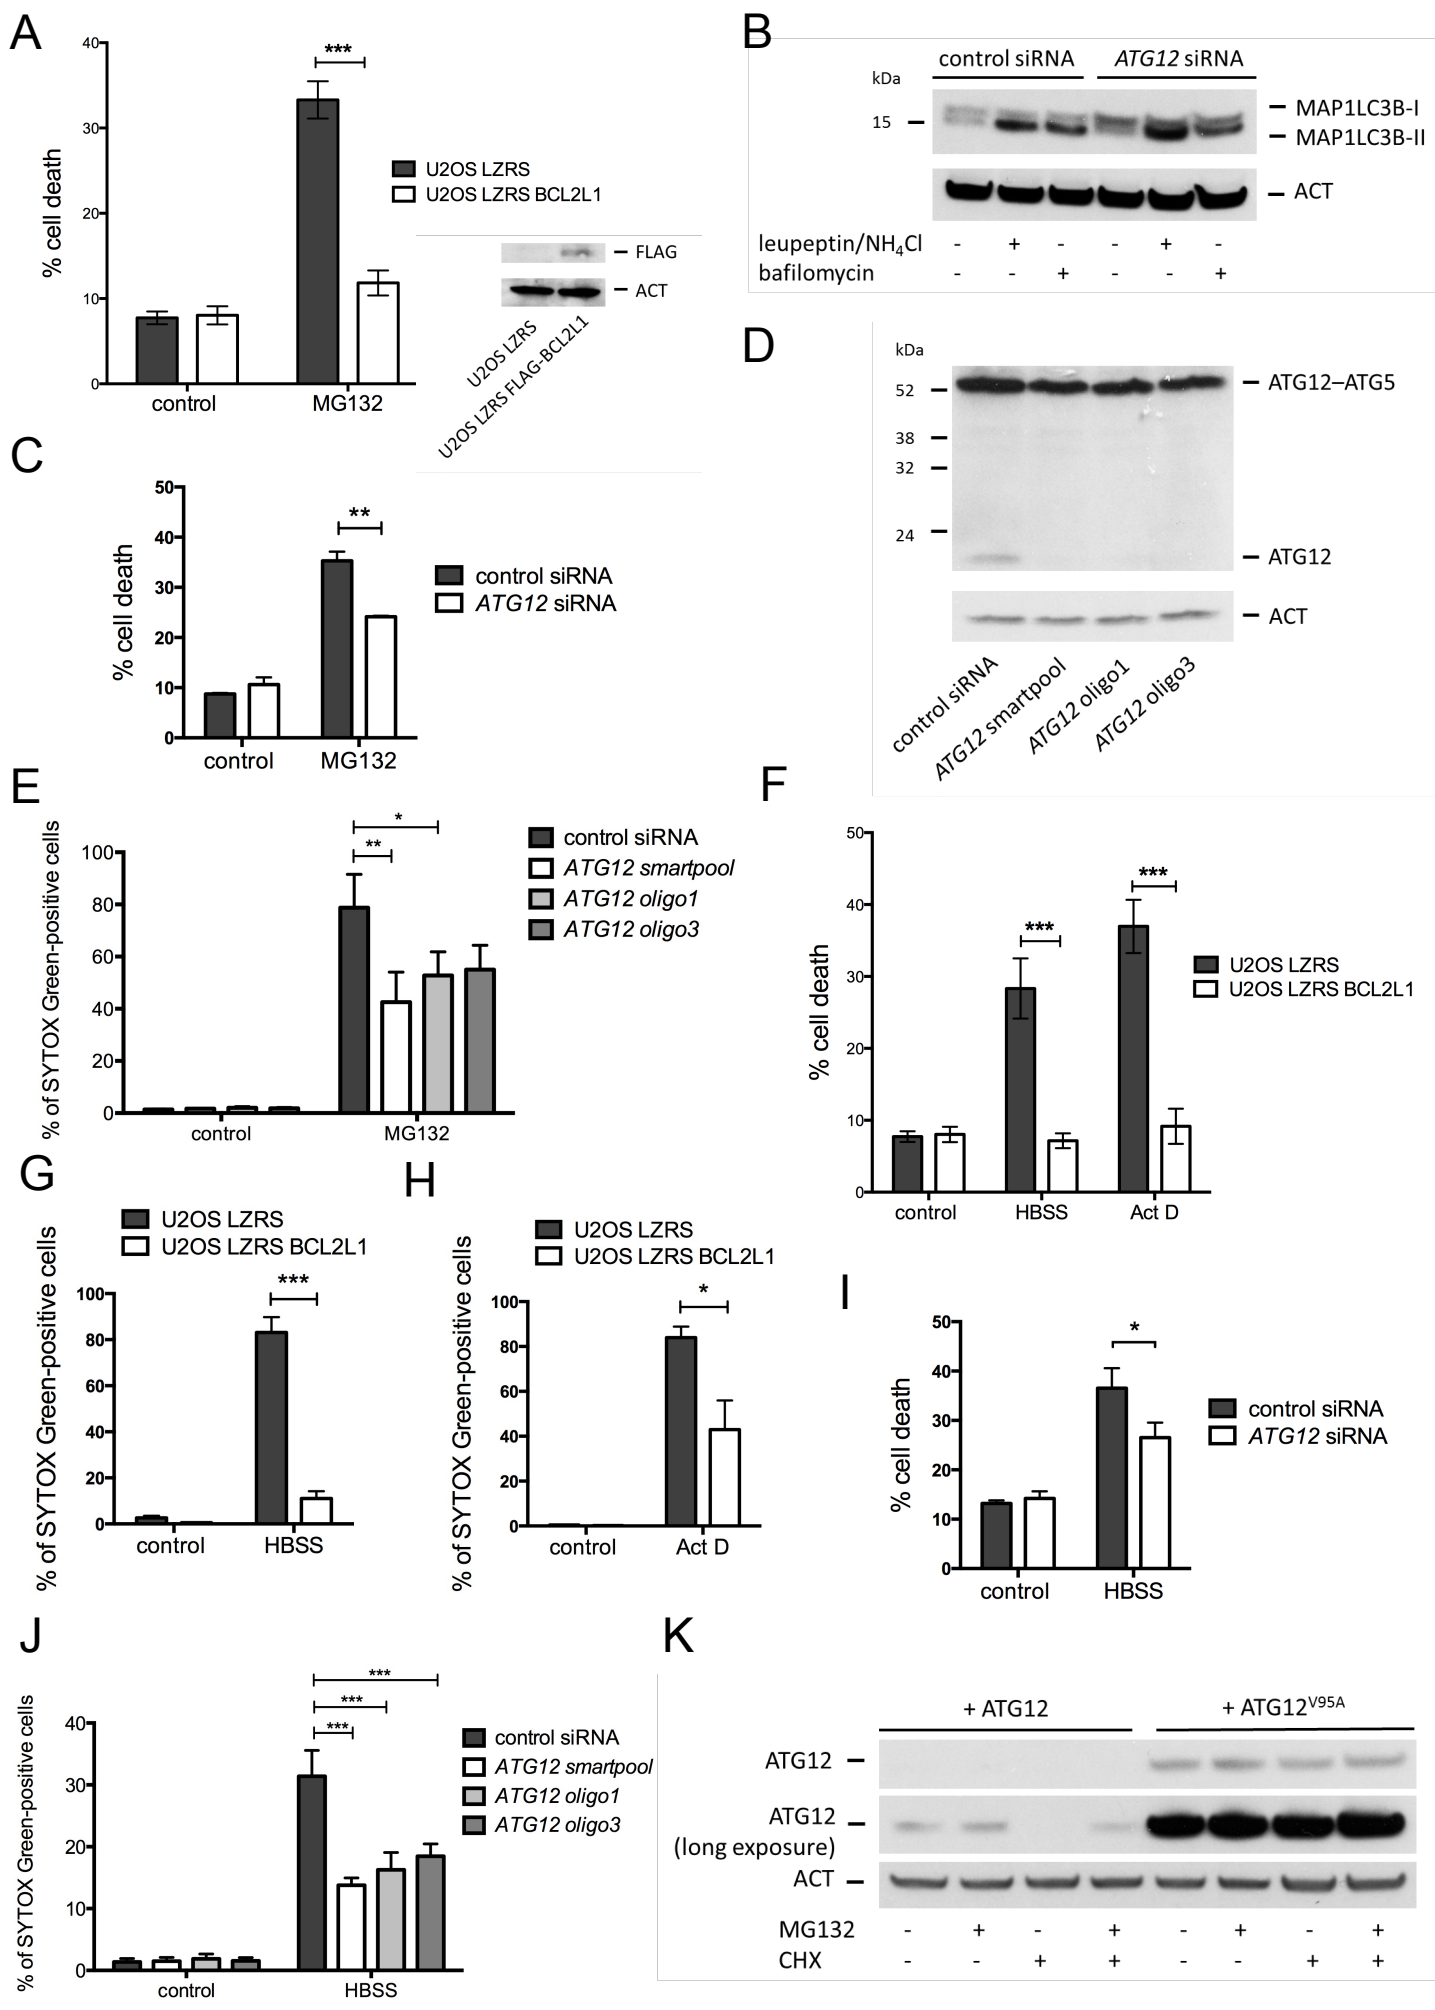

# Supplementary Figure 5

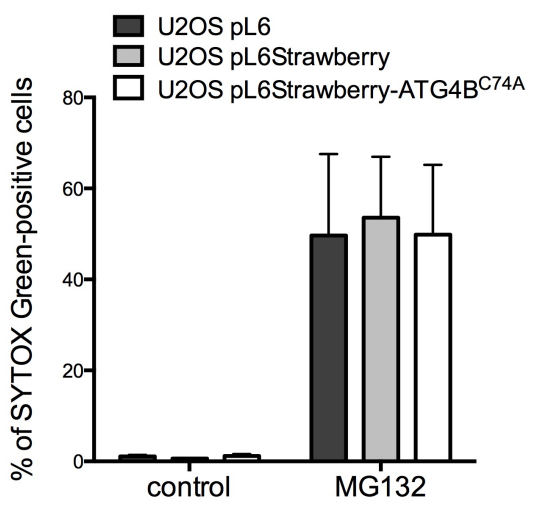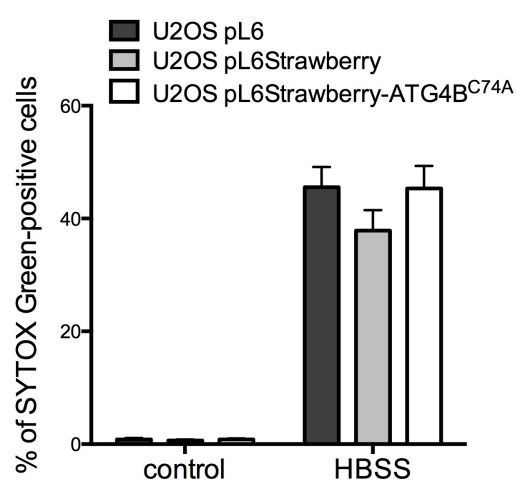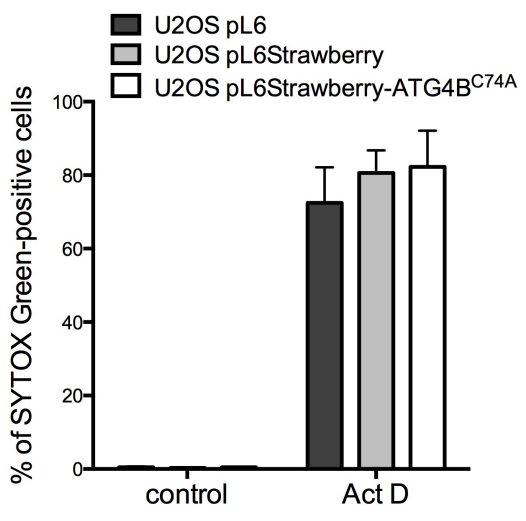

Supplement: kaup-10-12-981914-s002.pdf [file kaup-10-12-981914-s002.pdf]
